# Supplementary material for: Ultrafast heating to boost the electrocatalytic activity of iridium towards oxygen evolution reaction
Source: Royal Society of Chemistry journal article supplement (doi:10.1039/d1cc01999f), 2021-01-01
Supplement: d1cc01999f1.pdf [file d1cc01999f1.pdf]

## **Supporting Information**

### **Ultrafast Heating to Boost the Electrocatalytic Activity of Iridium towards Oxygen Evolution Reaction**

Bohan Deng,<sup>a</sup> Yuanzheng Long,<sup>a</sup> Cheng Yang,<sup>a</sup> Peng Du,<sup>ab</sup> Ruyue Wang,<sup>ab</sup> Kai Huang<sup>b</sup>  
and Hui Wu\*<sup>a</sup>

<sup>a</sup> State Key Laboratory of New Ceramics and Fine Processing, School of Materials  
Science and Engineering, Tsinghua University, Beijing, 100084, China. E-mail:  
[huiwu@tsinghua.edu.cn](mailto:huiwu@tsinghua.edu.cn)

<sup>b</sup> State Key Laboratory of Information Photonics and Optical Communications &  
School of Science, Beijing University of Posts and Telecommunications, Beijing  
100876, China.

## METHODS

**Materials Preparation.** Carbon paper was purchased from Toray Industries, Inc. The carbon paper was pre-cleaned with ethanol and deionized water for several times and then was treated in a horizontal tube furnace with continuous flow of argon gas at 1173 K for 1 h. After pretreatment, the carbon paper was cut into pieces of 1.0 cm  $\times$  4.0 cm and connected to copper foils using copper tapes in order to gain good electrical contact. Iridium trichloride ( $\text{IrCl}_3$ , Sigma-Aldrich) was dissolved in ethanol and 40  $\mu\text{L}$   $\text{IrCl}_3$  solution was gradually dropped onto the carbon paper. After the carbon paper was uniformly covered with the Ir precursor solution, a high current pulse (5A, 5s) generated from a DC power (ITECH, IT6502D) was applied to the carbon paper in air. An infrared imaging device (CEM, DT-980H) was used to measure the temperature evolution during the ultrafast heating process. The emissivity  $\epsilon$  was set as 0.95 and the reflected temperature compensation (RTC) was set as 298 K. After the heating process, the prepared sample (named as Ir/CP-UH) was cut from copper electrodes and rinsed with ethanol and deionized water for subsequent electrochemical measurements and other characterization.

To compare the effect of ultrafast heating, a contrast sample (named as Ir/CP-NH) was prepared by heating up the carbon paper covered with the Ir precursor solution to 800 K in a muffle furnace with a heating rate of 10 K  $\text{min}^{-1}$ . Except the heating process, other preparation processes of the Ir/CP-NH were the same as Ir/CP-UH.

**Catalyst characterizations.** X-ray diffraction analysis was performed by a D/max 2500V diffractometer in reflection mode at 40 kV and 150 mA with a scanning speed of 8  $^\circ \text{min}^{-1}$ . Scanning electron microscopy (SEM) images were taken by a Zeiss microscope (MERLIN VP Compact) operated at 10 kV. HAADF STEM images and HR-TEM images were taken by 2100F transmission electron microscope operated at 200 kV. The Ir loading of the catalysts was confirmed by using an inductively coupled plasma-optical emission spectrometer (Vista-MPX) after sample dissolution. X-ray photoelectron spectra were collected using a Thermo Fisher spectrometer (Escalab 250Xi) equipped with an Al  $K\alpha$  radiation source (1487.6 eV) and hemispherical analyzer with a pass energy of 30.0 eV and energy step size of 0.05 eV. All the XPS spectra were corrected by C 1s peak of 284.8 eV to prevent the charge effect. The raw curves were fitted using XPSPEAK41 software with Shirley backgrounds and Gaussian-Lorentzian functions.

**Electrochemical Measurements.** All electrochemical tests were carried out on a three-electrode cell connected to an electrochemical workstation (CHI 760E, Shanghai Chenhua Instruments). The alkaline electrolyte and acidic electrolyte were 1.0 M KOH and 0.5 M  $\text{H}_2\text{SO}_4$  saturated by  $\text{N}_2$  respectively. The sample was used as the working electrode (1 cm  $\times$  0.5 cm), a graphite rod was used as the counter electrode, and a Hg/HgO electrode and a Ag/AgCl electrode were used as the reference electrode for alkaline electrolyte and acidic electrolyte, respectively. To make a commercial Ir/C catalyst sample, 1mg 20% Ir/C (Premetek) was dispersed into a mixture solution (800  $\mu\text{L}$  of ethanol, 150  $\mu\text{L}$  of ultrapure water and 50  $\mu\text{L}$  of 5wt% Nafion solution). The mixture was treated by ultrasonic for 10 min to make a uniform catalyst ink. Subsequently, 50  $\mu\text{L}$  of catalyst ink was uniformly loaded onto carbon paper (1 cm  $\times$  0.5 cm), maintaining the loading of Ir element at 20  $\mu\text{g cm}^{-2}$ . Before electrochemical tests, Cyclic voltammetry (CV) was conducted between 1.0 to 1.5 V vs. RHE with a scan rates of 100 mV/s for 40 cycles to activate the sample. The OER activity was characterized by linear sweep voltammetry (LSV) over the potential range of 1.2 to 1.7

V vs. RHE at a scan rate of 5 mV/s. To eliminate the effect of solution resistance, the LSV curves were  $iR$  corrected by 90% of the solution resistance. The electrochemically active surface area (ECSA) was fitted by cyclic voltammetry curves in the potential of 0–0.1 V vs Hg/HgO at 5–50 mV s<sup>-1</sup>. Cyclic voltammetry (CV) was conducted between 1.2 V to 1.7 V vs. RHE with a scan rate of 100 mV/s. For stability test, chronopotentiometry was applied at the current of 10 mA/cm<sup>2</sup> for 10h. All assays were run at room temperature.

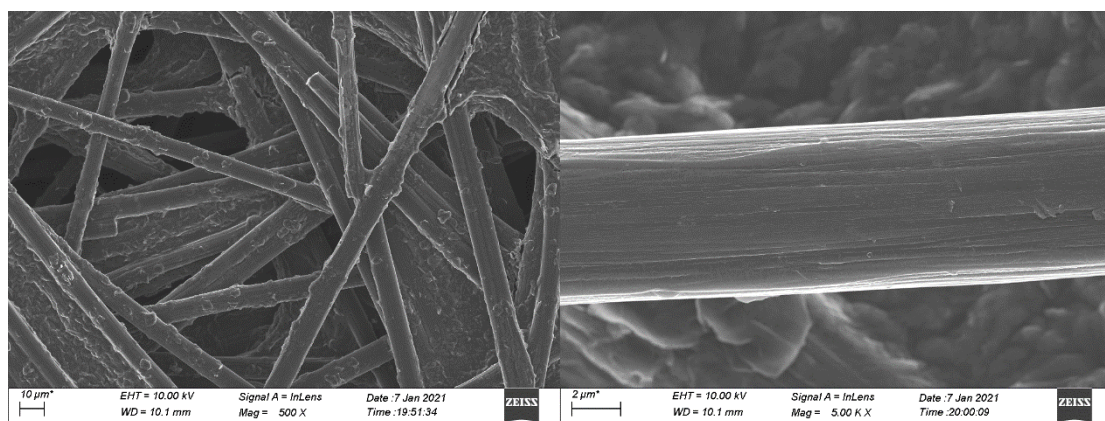

Figure S1. SEM images of original carbon paper at different magnifications.

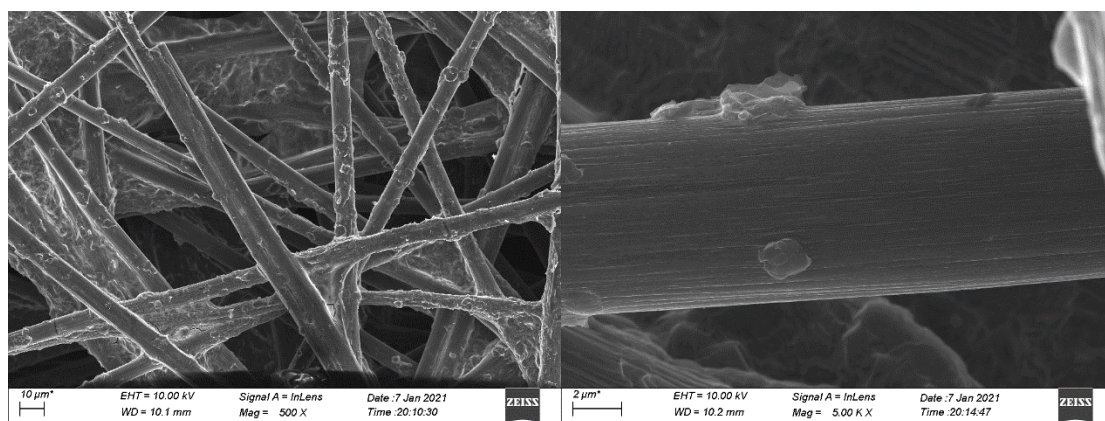

Figure S2. SEM images of Ir/CP-UH at different magnifications.

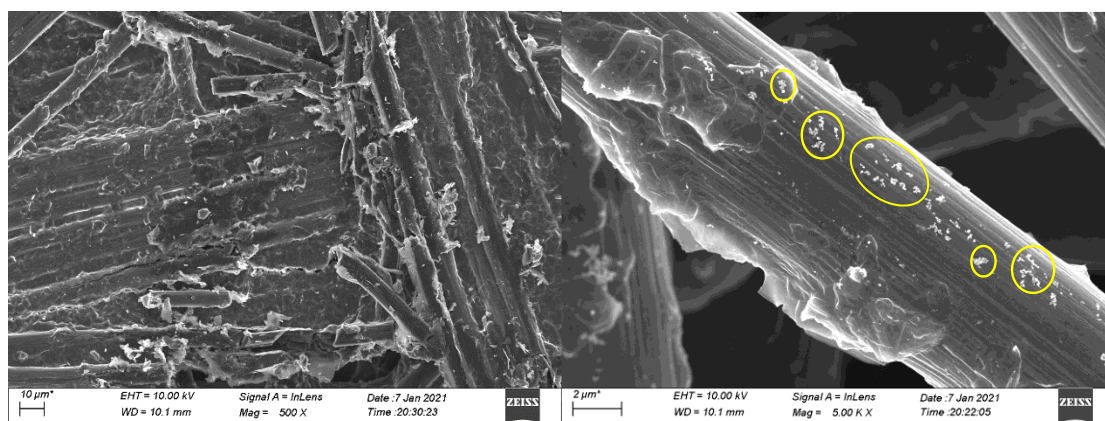

Figure S3. SEM images of Ir/CP-NH at different magnifications. Agglomerate Ir particles with sizes at around 100~300 nm (in yellow circles) can be found in Ir/CP-NH.

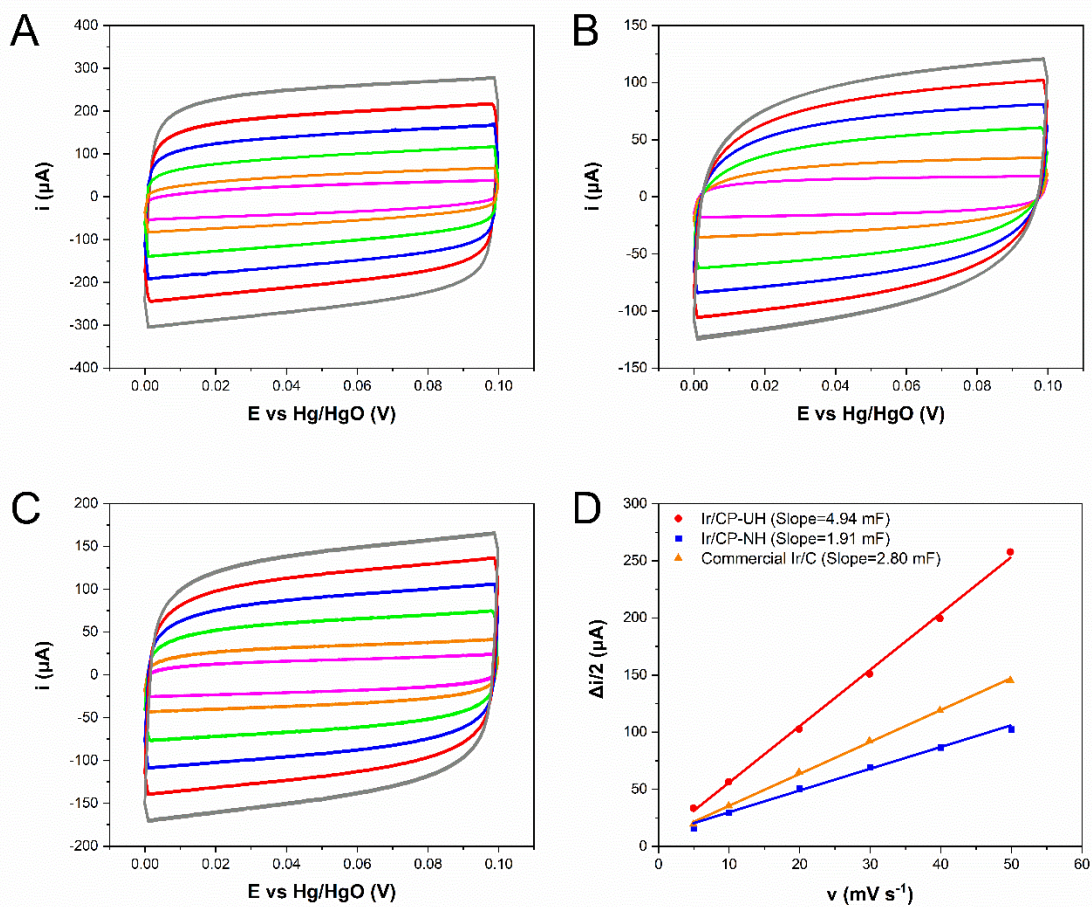

Figure S4. (A-C) CV curves measured in the non-faradaic potential (0-0.1 V vs Hg/HgO) at various scan rates (5, 10, 20, 30, 40 and 50  $\text{mV s}^{-1}$ ) for (A) Ir/CP-UH, (B) Ir/CP-NH and (C) commercial Ir/C. (D) The half currents difference at 0.05 V vs Hg/HgO plotted as a function of scan rate.

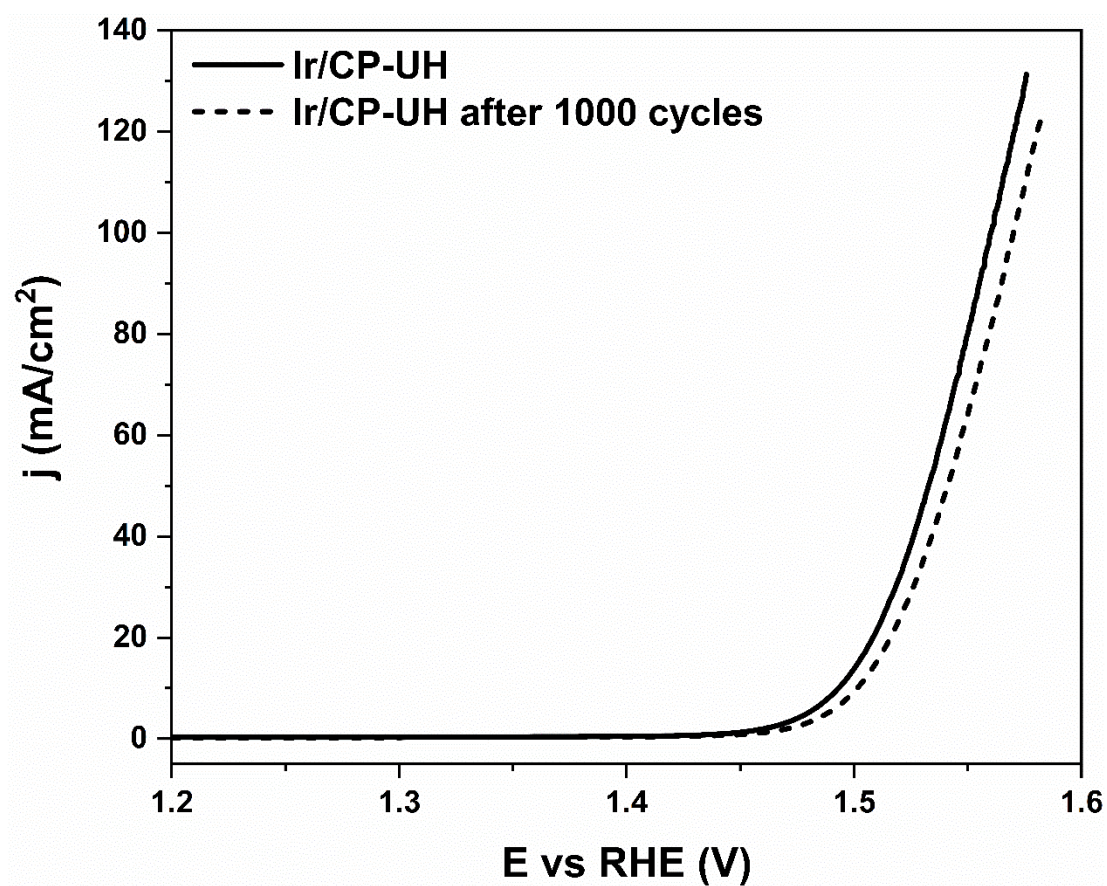

Figure S5. The LSV curves of Ir/CP-UH before and after accelerated CV measurement at 100 mV/s for 1000 cycles.

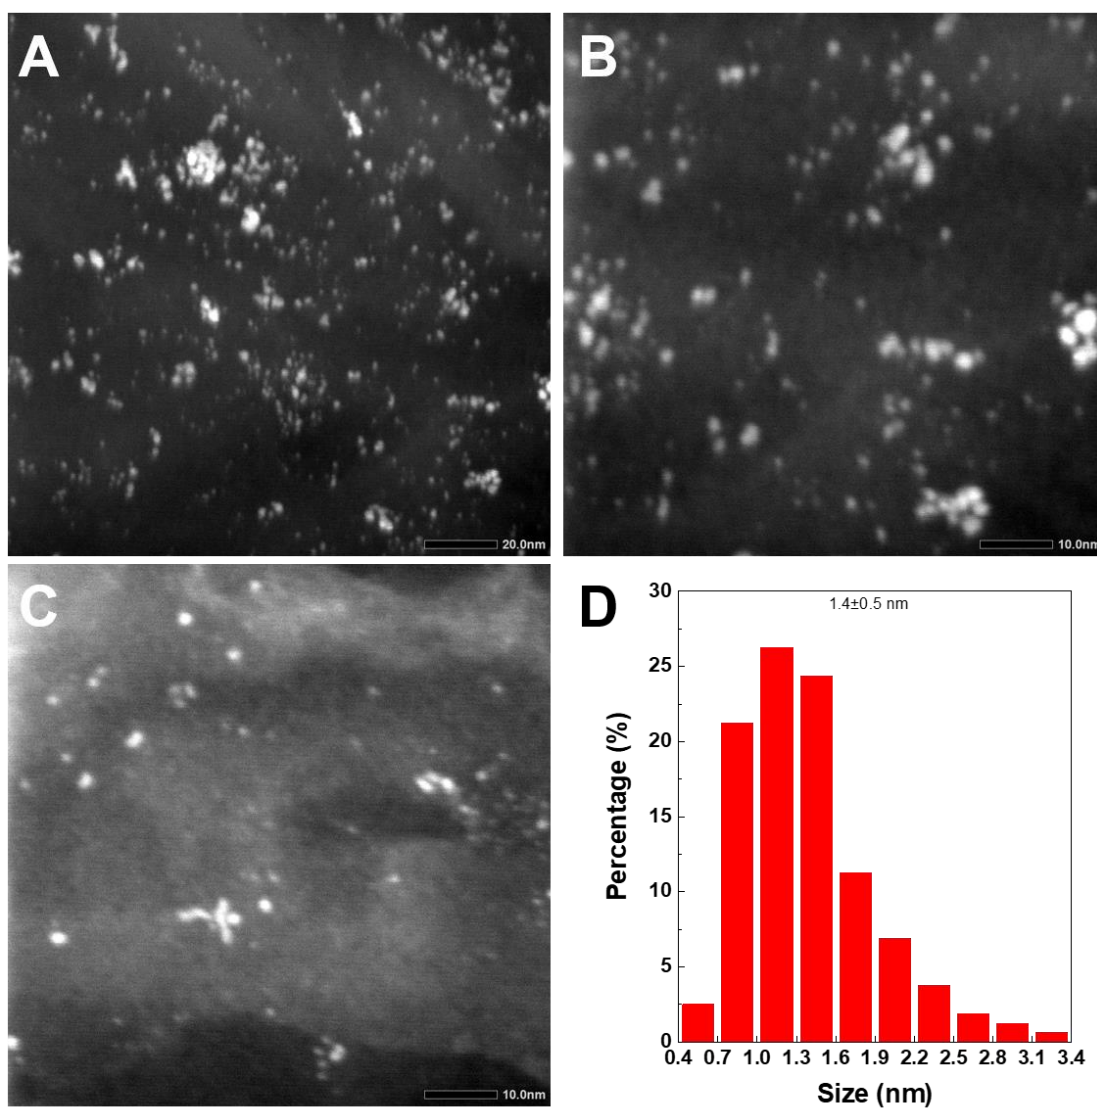

Figure S6. (A-C) STEM images of Ir/CP-UH after stability test (chronopotentiometry at 10 mA  $\text{cm}^{-2}$ ) at different magnifications. (D) Size distribution of Ir in Ir/CP-UH after stability test.

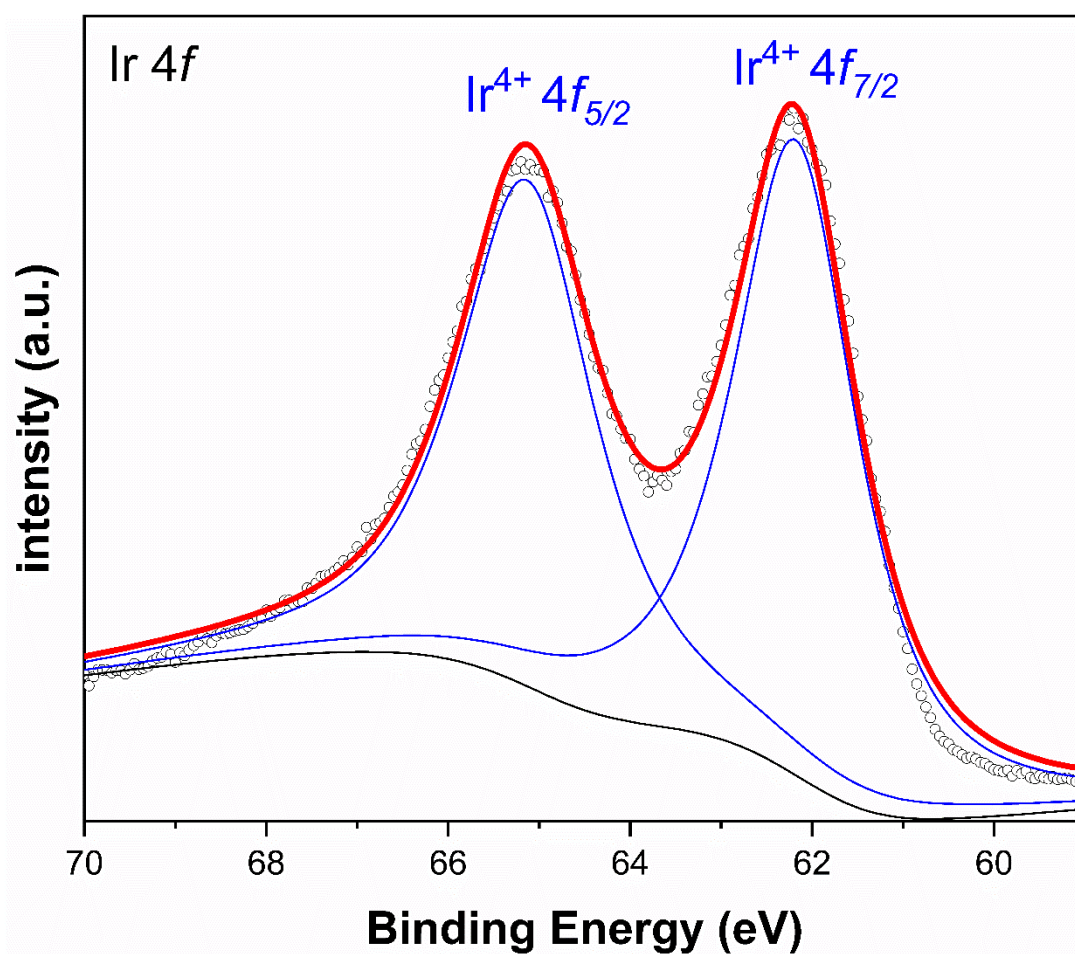

Figure S7. Ir 4f XPS spectra of Ir/CP-UH after stability test (chronopotentiometry at  $10 \text{ mA cm}^{-2}$ ). The Ir was oxidized to  $\text{IrO}_2$  after OER under high potential, which is the active site for OER.

Table S1. Summary of the OER activity of recently reported Ir based catalysts.

| Catalyst                              | Electrolyte                          | Ir loading<br>( $\mu\text{g cm}^{-2}$ ) | Overpotential<br>(mV)<br>at $j=10 \text{ mA cm}^{-2}$ | Tafel slope<br>(mV dec <sup>-1</sup> ) | Mass activity<br>( $\text{A g}_{\text{Ir}}^{-1}$ )<br>at 1.5V vs RHE | Refs.     |
|---------------------------------------|--------------------------------------|-----------------------------------------|-------------------------------------------------------|----------------------------------------|----------------------------------------------------------------------|-----------|
| Ir/CP-UH                              | 1.0M KOH                             | 12.3                                    | 260                                                   | 41.6                                   | 1405                                                                 | This work |
| Ir/CP-UH                              | 0.5M H <sub>2</sub> SO <sub>4</sub>  | 12.3                                    | 264                                                   | 68.3                                   | 981                                                                  | This work |
| Co@Ir/NC-10%                          | 1.0M KOH                             | 15.1                                    | 280                                                   | 73.8                                   |                                                                      | [1]       |
| Ir <sub>18</sub> wt %-NiO             | 1.0M KOH                             | 263                                     | 215                                                   | 38                                     |                                                                      | [2]       |
| Ir <sub>1</sub> @Co/NC                | 1.0M KOH                             | 3.6                                     | 260                                                   | 163                                    |                                                                      | [3]       |
| Ir/Ni(OH) <sub>2</sub>                | 1.0M KOH                             | 70                                      | 224                                                   | 41                                     |                                                                      | [4]       |
| IrO <sub>x</sub> -Ir                  | 0.5M H <sub>2</sub> SO <sub>4</sub>  | 133.3                                   | ~290                                                  | 43.7                                   |                                                                      | [5]       |
| Ir/GF                                 | 0.5M H <sub>2</sub> SO <sub>4</sub>  | 48.5                                    | 290                                                   | 46                                     |                                                                      | [6]       |
| Ir/TiO <sub>2</sub> -MoO <sub>x</sub> | 0.05M H <sub>2</sub> SO <sub>4</sub> | 37.5                                    | 290                                                   | /                                      |                                                                      | [7]       |
| IrNiO <sub>x</sub>                    | 0.05M H <sub>2</sub> SO <sub>4</sub> | 10.2                                    | ~330                                                  | /                                      |                                                                      | [8]       |
| /Meso-ATO-180                         |                                      |                                         |                                                       |                                        |                                                                      |           |
| IrO <sub>x</sub> /SrIrO <sub>3</sub>  | 0.5M H <sub>2</sub> SO <sub>4</sub>  | /                                       | 270                                                   | /                                      |                                                                      | [9]       |
| IrNi-RF                               | 0.1 M HClO <sub>4</sub>              | 13.2                                    | 313.6                                                 | 48.6                                   | 470 (@1.53V)                                                         | [10]      |
| Pt-Ir-Pd<br>nanocages                 | 0.1 M HClO <sub>4</sub>              | 16.8 (for<br>Pt+Ir+Pd)                  | 372                                                   | 128.7                                  | 200(@1.53V)                                                          | [11]      |

## References

1. D. Li, Z. Zong, Z. Tang, Z. Liu, S. Chen, Y. Tian and X. Wang, *Acs Sustainable Chemistry & Engineering*, 2018, 6, 5105-5114.
2. Q. Wang, X. Huang, Z. L. Zhao, M. Wang, B. Xiang, J. Li, Z. Feng, H. Xu and M. Gu, *J Am Chem Soc*, 2020, 142, 7425-7433.
3. W.-H. Lai, L.-F. Zhang, W.-B. Hua, S. Indris, Z.-C. Yan, Z. Hu, B. Zhang, Y. Liu, L. Wang, M. Liu, R. Liu, Y.-X. Wang, J.-Z. Wang, Z. Hu, H.-K. Liu, S.-L. Chou and S.-X. Dou, *Angewandte Chemie-International Edition*, 2019, 58, 11868-11873.
4. G. Zhao, P. Li, N. Cheng, S. X. Dou and W. Sun, *Adv. Mater.*, 2020, 32.
5. P. Lettenmeier, L. Wang, U. Golla-Schindler, P. Gazdzicki, N. A. Canas, M. Handl, R. Hiesgen, S. S. Hosseiny, A. S. Gago and K. A. Friedrich, *Angew Chem Int Ed Engl*, 2016, 55, 742-746.
6. J. Zhang, G. Wang, Z. Liao, P. Zhang, F. Wang, X. Zhuang, E. Zschech and X. Feng, *Nano Energy*, 2017, 40, 27-33.
7. E. J. Kim, J. Shin, J. Bak, S. J. Lee, K. H. Kim, D. Song, J. Roh, Y. Lee, H. Kim, K. S. Lee and E. Cho, *Applied Catalysis B-Environmental*, 2021, 280.
8. N. Hong Nhan, H.-S. Oh, T. Reier, E. Willinger, M.-G. Willinger, V. Petkov, D. Teschner and P. Strasser, *Angewandte Chemie-International Edition*, 2015, 54, 2975-2979.
9. L. C. Seitz, C. F. Dickens, K. Nishio, Y. Hikita, J. Montoya, A. Doyle, C. Kirk, A. Vojvodic, H. Y. Hwang, J. K. Nørskov and T. F. Jaramillo, *Science*, 2016, 353, 1011-1014.
10. H. Jin, Y. Hong, J. Yoon, A. Oh, N. K. Chaudhari, H. Baik, S. H. Joo and K. Lee, *Nano Energy*, 2017, 42, 17-25.
11. J. W. Zhu, M. H. Xie, Z. T. Chen, Z. H. Lyu, M. F. Chi, W. Q. Jin and Y. N. Xia, *Advanced Energy Materials*, 2020, 10.
